# Supplementary material
Source: PubMed Central journal article supplement (PMC8569410)
Supplement: bloodBLD2021011841-suppl1.pdf [file bloodBLD2021011841-suppl1.pdf]

**Supplemental Table 1.** Univariable and multivariable analyses of baseline characteristics as predictors of overall survival in admitted patients.

|                                                         | <b>HR</b> | <b>95% CI</b> | <b>P value</b> |
|---------------------------------------------------------|-----------|---------------|----------------|
| <b>Univariable Analyses</b>                             |           |               |                |
| Sex (male vs. female)                                   | 0.78      | 0.52 – 1.2    | 0.22           |
| Age at COVID-19 diagnosis ( $\geq 75$ vs. $< 75$ years) | 1.9       | 1.2 – 2.8     | 0.002          |
| CIRS ( $> 6$ vs. $\leq 6$ )                             | 1.9       | 1.2 – 2.9     | 0.008          |
| Hypogammaglobulinemia                                   | 0.94      | 0.61 – 1.5    | 0.78           |
| Ever treated vs. “watch and wait”                       | 1.2       | 0.80 – 1.8    | 0.39           |
| Currently treated vs. observation                       | 0.96      | 0.64 – 1.4    | 0.85           |
| Current BTKi therapy                                    | 1.1       | 0.71 – 1.7    | 0.37           |
| Prior lines of therapy (continuous variable)            | 1.1       | 0.96 – 1.2    | 0.20           |
| <b>Multivariable Analyses</b>                           |           |               |                |
| Age at COVID-19 diagnosis ( $\geq 75$ vs. $< 75$ years) | 1.6       | 1.1 – 2.4     | 0.02           |
| CIRS ( $> 6$ vs. $\leq 6$ )                             | 1.6       | 1.0 – 2.6     | 0.04           |

**Supplemental Table 2.** Examination of COVID-19 management strategies for patients admitted for COVID-19, as well as risk of death for patients who received each agent.

| <b>Agents used for COVID-19 in admitted patients (n=280)</b> | <b>Proportion who received this agent</b> | <b>Number with available data</b> | <b>HR</b> | <b>95% CI</b> | <b>P value</b> |
|--------------------------------------------------------------|-------------------------------------------|-----------------------------------|-----------|---------------|----------------|
| Corticosteroids                                              | 54%                                       | 267                               | 1.73      | 1.13 – 2.64   | 0.01           |
| Hydroxychloroquine                                           | 48%                                       | 267                               | 1.53      | 1.01 – 2.30   | 0.04           |
| Tocilizumab                                                  | 17%                                       | 266                               | 1.61      | 0.99 – 2.63   | 0.06           |
| Remdesivir                                                   | 18%                                       | 265                               | 0.48      | 0.25 – 0.92   | 0.03           |
| Convalescent Plasma                                          | 18%                                       | 230                               | 0.50      | 0.26 – 0.96   | 0.04           |

**Supplemental Table 3.** Examination of COVID-19 management strategies for patients admitted for COVID-19 who required supplemental oxygen, as well as risk of death for patients who received each agent.

| <b>Agents used for COVID-19 in admitted patients who required oxygen (n=244)</b> | <b>Proportion who received this agent</b> | <b>Number with available data</b> | <b>HR</b> | <b>95% CI</b> | <b>P value</b> |
|----------------------------------------------------------------------------------|-------------------------------------------|-----------------------------------|-----------|---------------|----------------|
| Corticosteroids                                                                  | 58%                                       | 236                               | 1.42      | 0.93 – 2.19   | 0.11           |
| Hydroxychloroquine                                                               | 51%                                       | 235                               | 1.29      | 0.85 – 1.95   | 0.23           |
| Tocilizumab                                                                      | 18%                                       | 234                               | 1.40      | 0.86 – 2.28   | 0.18           |
| Remdesivir                                                                       | 18%                                       | 234                               | 0.42      | 0.21 – 0.83   | 0.01           |
| Convalescent Plasma                                                              | 17%                                       | 205                               | 0.48      | 0.24 – 0.97   | 0.04           |

**Supplemental Table 4.** Baseline characteristics and management for those who received vs. did not receive corticosteroids during COVID-19 course.

|                                                    | Corticosteroids (n=147)                |                            | No corticosteroids (n=209)             |                            |
|----------------------------------------------------|----------------------------------------|----------------------------|----------------------------------------|----------------------------|
|                                                    | Proportion, unless otherwise specified | Number with available data | Proportion, unless otherwise specified | Number with available data |
| <b>Baseline Characteristics</b>                    |                                        |                            |                                        |                            |
| Age at COVID-19 diagnosis, median in years (range) | 72 (44 – 93)                           | 147                        | 66 (29 – 98)                           | 209                        |
| Male                                               | 65%                                    | 147                        | 63%                                    | 209                        |
| White                                              | 85%                                    | 147                        | 86%                                    | 200                        |
| CIRS, median (range)                               | 9 (4-32)                               | 138                        | 7.5 (4-21)                             | 190                        |
| <b>CLL treatment history</b>                       |                                        | 147                        |                                        | 208                        |
| Never treated                                      | 41%                                    |                            | 46%                                    |                            |
| Prior therapy                                      | 59%                                    |                            | 54%                                    |                            |
| Receiving therapy at time of COVID-19 diagnosis    | 41%                                    | 147                        | 36%                                    | 209                        |
| <b>COVID-19 Course</b>                             |                                        |                            |                                        |                            |
| Admitted                                           | 98%                                    | 147                        | 59%                                    | 208                        |
| ICU Admission                                      | 39%                                    | 142                        | 17%                                    | 206                        |
| Imaging Performed                                  | 97%                                    | 145                        | 69%                                    | 201                        |
| Pneumonia on Imaging                               | 91%                                    | 141                        | 72%                                    | 160                        |
| Supplemental Oxygen                                | 94%                                    | 145                        | 49%                                    | 206                        |
| Mechanical Ventilation                             | 30%                                    | 143                        | 12%                                    | 203                        |
| Secondary Infection                                | 25%                                    | 107                        | 7%                                     | 166                        |

**Supplemental Figure 1.** Overall survival from the time of COVID-19 diagnosis of stratified by receipt of steroids for treatment of COVID-19 for patients who required oxygen

# Overall Survival by Corticosteroid Administration

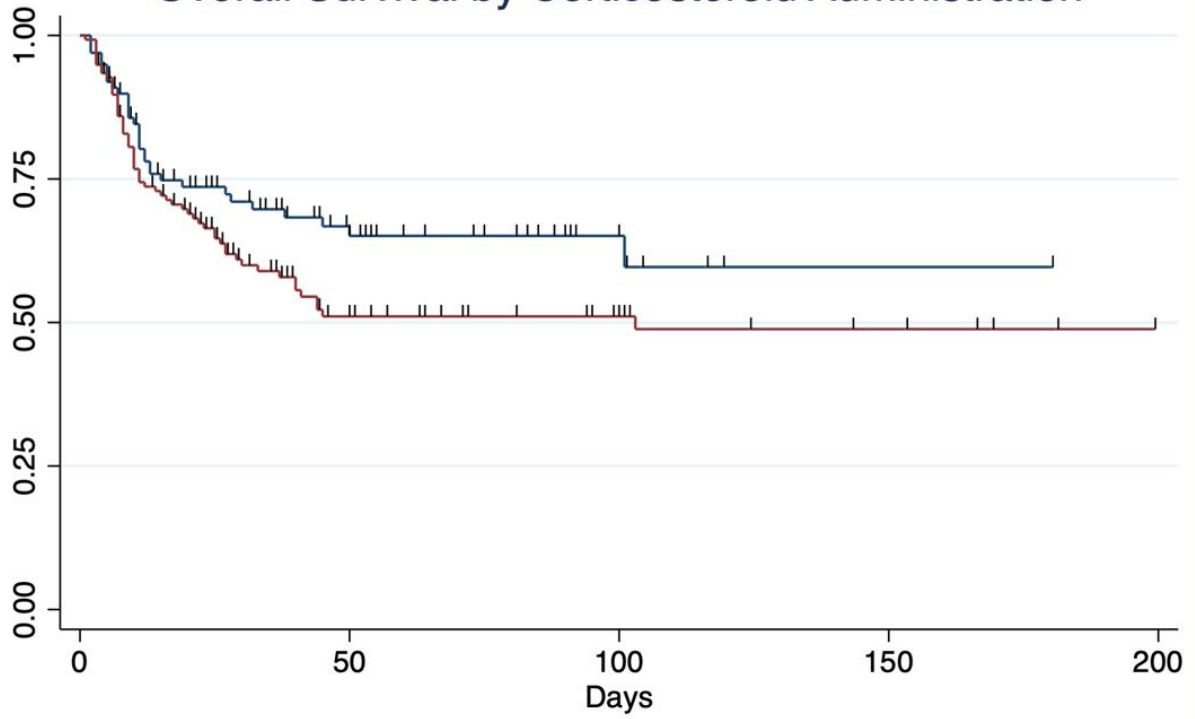

— No Steroids    — Steroids
